# Supplementary material
Source: Frontiers journal article supplement (https://www.frontiersin.org/articles/545243)

# **Cognitive Stimulation Therapy (CST) for People with Dementia: Implementation Plan for Rio de Janeiro and São Paulo, Brazil.**

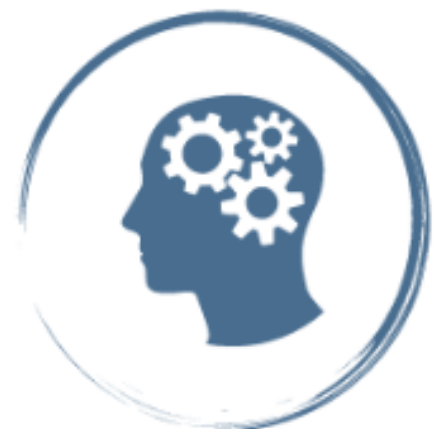

## Table of Contents

|                                                                            |           |
|----------------------------------------------------------------------------|-----------|
| <b>Table of Contents .....</b>                                             | <b>2</b>  |
| <b>Guide to Using the Implementation and Action Plans .....</b>            | <b>4</b>  |
| <b>Summary of Responses and Justification for Selected Mechanisms.....</b> | <b>4</b>  |
| Responder Information .....                                                | 4         |
| Justification for Selected Mechanisms.....                                 | 5         |
| <b>Implementation Plan .....</b>                                           | <b>7</b>  |
| Travel .....                                                               | 7         |
| Knowledge/ beliefs about the intervention .....                            | 7         |
| Relative Advantage .....                                                   | 8         |
| Costs (Direct and Indirect).....                                           | 8         |
| Adaptability.....                                                          | 8         |
| Networks and Communications .....                                          | 9         |
| External policy and incentives .....                                       | 10        |
| Structural Characteristics .....                                           | 10        |
| Individual Stage of Changes .....                                          | 11        |
| <b>Action Plans.....</b>                                                   | <b>12</b> |
| Travel .....                                                               | 12        |
| Knowledge/ Beliefs about the Intervention .....                            | 12        |
| Relative Advantage .....                                                   | 12        |
| Costs (Direct and Indirect).....                                           | 13        |
| Adaptability.....                                                          | 13        |
| Network and Communications .....                                           | 13        |
| External policy and incentives .....                                       | 14        |
| Structural Characteristics .....                                           | 14        |

|                                                                   |           |
|-------------------------------------------------------------------|-----------|
| Individual Stage of Changes .....                                 | 15        |
| <b>Action Plans for Individual Investigators.....</b>             | <b>16</b> |
| Researcher 1 .....                                                | 16        |
| Researcher 2.....                                                 | 17        |
| Researcher 3.....                                                 | 18        |
| Researcher 4.....                                                 | 18        |
| Researcher 5.....                                                 | 20        |
| Researcher 6.....                                                 | 21        |
| Researcher 7.....                                                 | 22        |
| Researcher 8.....                                                 | 22        |
| Researcher 9.....                                                 | 23        |
| Researcher 10.....                                                | 23        |
| Researcher 11.....                                                | 23        |
| Individual CST Facilitators.....                                  | 23        |
| <b>Appendix 1: Barriers and Facilitators Local Checklist.....</b> | <b>25</b> |

### **Guide to Using the Implementation and Action Plans**

Headings for each section refer to categories from the Consolidated Framework for Implementation Research (CFIR), which were identified as part of stakeholder meetings in Tanzania. The CFIR underpins and informs all work conducted as part of CST-International. Headings are then further divided into mechanisms that are ‘essential’ and mechanisms that researchers can ‘further consider’. Mechanisms that are essential will be implemented by CST-International investigators in Brazil and ‘further consider’ mechanisms can be implemented if the team feel there is sufficient resources available. Each mechanism selected for use has been justified (pg 5 – 6). This is followed by a written summary of the mechanisms, with hyperlinks to specific ‘action plans’ associated with each of the categories (pg 12 – 15). Researchers can refer to these action plans and use them to monitor progress. For ease, the last section of this plan (pg 16 – 24) contains all of the aforementioned action plans but compiled for each individual investigator. An effort has been made to divide these equally amongst staff, allowing for time allocated to the grant (e.g. 5% FTE versus 10% FTE). Finally, the local barrier and facilitator checklist is included as Appendix 1 (pg 25).

### **Summary of Responses and Justification for Selected Mechanisms**

#### ***Responder Information***

Thirty-three stakeholders, identified during Phase One of the trial, rated how essential and easy the identified mechanism to support implementation in Brazil were to use. In brief, responders were asked to rate each of the 41 identified mechanisms, according to the below matrix and the modes for each of the mechanisms were examined.

The mechanism is:

- 1 = Advisory and Difficult (AD)
- 2 = Advisory and Intermediate (AI)
- 3 = Advisory and Easy (AE)
- 4 = Desirable and Difficult (DD)
- 5 = Essential and Difficult (ED)
- 6 = Desirable and Intermediate (DI)
- 7 = Desirable and Easy (DE)
- 8 = Essential and Intermediate (EI)
- 9 = Essential and Easy (EE)

For the full methodology associated with this stage, please see the documents entitled ‘Stakeholder Methods V2’ and ‘Implementation Plan Methods V2’.

Responders consisted of five members of the CST-International research team (two psychologists, one psychiatrist, one PhD candidate and one research assistant) and sixteen potential CST facilitators (Group 2), for whom professions included psychologists, nurses, physicians, gerontologist, speech therapist, recreation worker and social worker. Six decision makers from the private and public sectors responded on behalf of Group 1 (local policy or decision makers). For Group 3 (people with dementia, caregivers and other interested parties), six caregivers responded. In addition to rating the table, 4 people gave additional qualitative feedback.

### ***Justification for Selected Mechanisms***

The most common individual rating for mechanisms was ‘8’ (Essential and Intermediate), however, there was a large amount of variance in responses. For example, the mechanism ‘CST training should be delivered where CST sessions are going to be offered’ was rated as advisory and intermediate (2) by two responders and essential and easy (9) by two responders. All mechanisms were discussed at a local team meeting, with reference to how many could be implemented and the prioritisation of those mechanisms that were rated as both ‘essential’ for implementation and ‘easy’ to use. It was decided that mechanisms rated as essential and easy/intermediate to implement would always be categorised as ‘essential’ and mechanisms with lower modes would be categorised as ‘further consider. A draft implementation plan was then circulated, and CST-Investigators were invited to comment and refine the plan, before a finalised plan was agreed upon.

### ***Travel***

Two desirable mechanisms for travel were identified, both related to settings where CST should be offered in order to reduce patients’ travel time and will be further considered.

### ***Knowledge/ beliefs about the intervention***

Seven essential mechanisms were identified. They were all related to training courses and will be used.

*Cost (direct and indirect)*

Costs are likely to have a significant impact on the implementation of CST and should be prioritised. One mechanism was identified as essential and two were identified as desirable but it was also identified as being easy to implement, so both mechanisms will be used.

*Adaptability*

Three mechanisms were deemed essential and of intermediate difficulty to use. All mechanisms relate to creating new material for CST in order to adapt the therapy for different populations (e.g. illiterate people). These mechanisms will be considered after the data collection phase.

*Relative advantage*

Two mechanisms were rated as essential and easy. One was rated desirable and intermediate, but as it relates to the training course, it can be incorporated into similar actions from previous implementation areas, with no additional resources needed. All mechanisms for this stage will be used.

*Network and Communications*

Three mechanisms were rated as essential and easy and three as essential and intermediate. All mechanisms were related to advertising CST and will be used.

*External policy and incentives*

One mechanism was rated as essential and intermediate, one as essential and difficult and one as advisory and difficult. The mechanism rated as essential and intermediate will be used, there others will be further considered.

*Structural characteristics*

Nine mechanisms were rated as essential and easy or intermediate, four were related to available time for facilitators to be trained and to run CST groups, two were related to the changes in the service organization in order to include CST sessions, one was related to appropriate meeting space, one was related to available time for PwD and carers to attend

CST sessions and one was related to general instruction about CST for staff, all nine mechanisms will be used. Also two mechanisms were rated as desirable and intermediate and one as essential but difficult to implement, these mechanisms will be further considered.

### *Individual Stage of Changes*

One mechanism was rated as desirable and intermediate and related to training for carers regarding individual CST. It will be further considered.

## **Implementation Plan**

### ***Travel***

#### *Further consider*

- 1) *CST Sessions in local community settings:* In order to facilitate patients' access to CST, CST-Investigators should approach leaders in community settings as possible sites offering CST (action 1.1).
- 2) *CST Sessions in hospital outpatient clinics:* In order to facilitate patients' access to CST, CST-Investigators should approach managers of hospital outpatient clinics as possible sites offering CST (action 1.2).

### ***Knowledge/ beliefs about the intervention***

#### *Essential*

- 1) *Development of a Dementia Awareness Course (DAC):* This will be primarily aimed at educating carers of people with dementia. The three-hour course will contain information regarding the difference between natural aging and dementia, designed to combat the stigma of dementia, as well as information on other pharmacological and non-pharmacological treatments for people with dementia (action 2.1). Cultural adaptations for the Brazilian population, with specific signposting for each site, will be made by Researcher 1 and Researcher 8, in Rio de Janeiro and São José dos Campos, respectively (action 2.2). The course material will be translated Researcher 3 (action 2.3). Attendees will be invited by Researcher 3 (Rio de Janeiro) and by Researcher 6 (São José dos Campos) (action 2.4). The course will be run by Researcher 1 in Rio de Janeiro and Researcher 6 in São José dos Campos (actions 2.5).

- 2) *Training for CST-facilitators:* Considering that dementia is not included in formal curriculum for healthcare professionals' formation, potential CST-facilitators should attend the DAC as part of the CST training (action 2.6).

### ***Relative Advantage***

#### ***Essential***

- 1) *Use evidence-based benefits of CST to recruit sites:* As a strategy to recruit sites, CST-Investigators will explain the evidence-based benefits to sites managers when approaching/recruiting sites (action 3.1).
- 2) *Explain benefits of CST to people with dementia and their caregivers:* Benefits of CST will be explained to people with dementia and their caregivers in order to increase patients and caregivers' adherence. It will be incorporated into the DAC (actions 2.7 and 2.8) delivered as part of the intervention.
- 3) *Explain benefits of CST to CST-facilitators:* During CST training, benefits of CST will be explained to possible CST-facilitators in order to help recruitment of CST-facilitators and increase motivation to deliver CST sessions (action 3.2).

### ***Costs (Direct and Indirect)***

#### ***Essential***

- 1) *CST training delivered where CST session are going to be offered:* To avoid additional costs for future sites and CST-facilitators, CST-Investigators will organize CST training on sites where CST sessions are going to be offered (action 4.1).
- 4) *Provide CST cost-effectiveness analysis:* CST-Investigators should discuss the cost-effectiveness analysis indicating CST is a cheaper alternative with sites managers when approaching/recruiting sites. It will be incorporated into the strategies to recruit sites (action 3.1).
- 2) *Utilize already available resources:* In order to limit the cost of the intervention, CST-facilitators should utilize the resources already available on site as material for the CST sessions (action 4.2).

### ***Adaptability***

#### ***Further consider***



- 1) *Adapt CST material to illiterate people, people with disabilities and people with severe dementia:* As illiteracy is common in the Brazilian population, CST-Investigators should develop CST material for this specific population (action 5.1). In order to include all people with dementia, CST-Investigators should also consider developing CST material for people with disabilities and people with severe dementia (actions 5.2 and 5.3).

## ***Networks and Communications***

### ***Essential***

- 1) *Advertising CST groups at carer associations:* CST-Investigators will contact carer associations to facilitate advertising CST groups at national and regional levels. This will include information on CST and where people with dementia and their carers can access the therapy or further information (action 6.1). Advertising strategies should include non-stigmatizing words.
- 2) *Advertising CST groups at geriatrician associations:* CST-Investigators will contact geriatrician associations to facilitate advertising CST groups at national and regional levels. This will include information on CST and where people with dementia and their carers can access the therapy or further information (action 6.2). Advertising strategies should include non-stigmatizing words.
- 3) *Local advertising:* CST will be advertised through community centres, specialized polyclinics and via general practitioners. Investigators should attempt to ensure that costs are minimal and that it is an effective use of time. Advertising must include information on CST and where people with dementia and their carers can access the therapy or further information (action 6.3). Advertising strategies should include non-stigmatizing words.
- 4) *Identify key spokesperson:* A key spokesperson will be identified in each site (carer associations, geriatrician associations, community centres, etc), in order to facilitate advertising CST groups to people with dementia and their carers (action 6.4).

Whilst not discussed by groups, some aspects of network and communication are a requirement of CST implementation and will therefore be included in the present implementation plan.

- 5) *Development of a Master Training Programme:* A training course for ‘master trainers’ will be developed in the UK, primarily by Researcher 10 (action 6.5). This will be used to increase the pool of available trainers in all countries.
- 6) *Supervision of CST Facilitators:* Newly trained CST facilitators will have regular supervision, using the most appropriate means available (e.g. WhatsApp if necessary or face to face) (action 6.6).

### ***External policy and incentives***

#### ***Essential***

- 1) *Liaison with government stakeholders:* CST-Investigators should contact government stakeholders to discuss the possibility of implement CST at a policy level (action 7.1).

#### ***Further consider***

- 2) *Public and Private funding:* CST-Investigators should contact people responsible for decision making at a policy level in public and private domains to discuss the creation of private and public funding mechanisms for implementation of CST (action 7.2).
- 3) *Insurance Coverage:* Investigators should consider contacting prominent insurance companies to determine whether CST would be covered by insurers as part of a ‘talking therapy’ (action 7.3)

### ***Structural Characteristics***

#### ***Essential***

- 1) *Protected time:* CST facilitators will need protected time allocated for CST (training and running sessions), as well for updating their knowledge about dementia in general. CST-Investigators should inform site management that protected time for staff is a requirement of the project when approaching/ recruiting sites and ensure that site managers agree to this (action 8.1).
- 2) *Changes in site organization:* CST-Investigators should inform site management that inclusion of CST into the weekly routine is a requirement of the project when approaching/ recruiting sites and ensure that site managers agree to this (action 8.2).
- 3) *Planning CST training:* CST training will be offered on different days/times in order to attend the needs of potential CST-facilitators (action 8.3).

- 4) *Planning CST sessions*: Considering that CST is a 7-week programme and that two CST-facilitators are needed, CST-facilitators will plan the sessions according the staff holiday schedule (action 8.4). In order to increase adherence CST-facilitators will agree with carers which days and times are best for running CST groups (action 8.5).
- 5) *Minimal availability of space*: When approaching/ recruiting sites, CST-Investigators will check that the site has an available space appropriate for running CST sessions (action 8.6).
- 6) *Information regarding CST for staff*: The staff of the site where CST is being delivered will receive information regarding CST and instruction on how to help facilitate the implementation (e.g. avoid interrupting the session) (action 8.7).

*Further consider*

- 7) *Combination of CST Sessions*: Sessions can be combined, or not, depending on the context (e.g. in long term care facilities where patients are living on site combination of sessions should be avoided). CST facilitators should agree with carers whether sessions should run once or twice a week (action 8.8).
- 8) *Access for people with disabilities*: When approaching/recruiting sites, CST-Investigators should prefer sites that can be easily accessed by people with disabilities (action 8.9).
- 9) *Identification of underdiagnosed cases of dementia*: CST-Investigators should meet with teams in charge for screening for dementia in each site to identify potential underdiagnosed cases (action 8.10).

***Individual Stage of Changes***

*Further consider*

- 1) *Training for carers to deliver individual Cognitive Stimulation Therapy (iCST)*: Carers should be trained to deliver iCST to patient after the end of the CST sessions (action 9.1).

### Action Plans

#### **Travel**

*Further consider*

| <b>Site: Rio de Janeiro / São José dos Campos Country: Brazil</b>                                                   |                                    |                              |
|---------------------------------------------------------------------------------------------------------------------|------------------------------------|------------------------------|
| <b>Action to be undertaken</b>                                                                                      | <b>Team member responsible for</b> | <b>Due by</b>                |
| <i>1.1 CST-Investigators should approach leaders in community settings as possible sites offering CST</i>           | Researchers 2, 4 and 5             | 31 <sup>st</sup> July (2020) |
| <i>1.2 CST-Investigators should approach managers of hospital outpatient clinics as possible sites offering CST</i> | Researchers 2, 4 and 5             | 31 <sup>st</sup> July (2020) |

#### **Knowledge/ Beliefs about the Intervention**

*Essential*

| <b>Site: Rio de Janeiro / São José dos Campos Country: Brazil</b>                                                                                                   |                                    |                                   |
|---------------------------------------------------------------------------------------------------------------------------------------------------------------------|------------------------------------|-----------------------------------|
| <b>Action to be undertaken</b>                                                                                                                                      | <b>Team member responsible for</b> | <b>Due by</b>                     |
| <i>2.1 Develop a 3-hour dementia awareness course for family carers, with information on stigma, pharmacological and non-pharmacological interventions included</i> | Researcher 11                      | 31 <sup>st</sup> May (2019)       |
| <i>2.2 Cultural adaptations of the Dementia Awareness Courses (DAC) with specific signposting for each site</i>                                                     | Researchers 1 and 8                | 31 <sup>st</sup> August (2019)    |
| <i>2.3 Translation of the DAC material into Portuguese</i>                                                                                                          | Researcher 3                       | 30 <sup>th</sup> September (2019) |
| <i>2.4 Invite and organise (room booking etc) DAC for family carers and possible CST-facilitators</i>                                                               | Researcher 3 and 6                 | 30 <sup>th</sup> June (2020)      |
| <i>2.5 Deliver the three hour DAC at regular intervals</i>                                                                                                          | Researchers 1 and 6                | 30 <sup>th</sup> June (2020)      |

#### **Relative Advantage**

*Essential*

| <b>Site: Rio de Janeiro / São José dos Campos Country: Brazil</b> |                                    |               |
|-------------------------------------------------------------------|------------------------------------|---------------|
| <b>Action to be undertaken</b>                                    | <b>Team member responsible for</b> | <b>Due by</b> |

|                                                                                                                                                                                                       |                        |                              |
|-------------------------------------------------------------------------------------------------------------------------------------------------------------------------------------------------------|------------------------|------------------------------|
| <i>3.1 CST-Investigators will explain the evidence-based benefits and the cost-effectiveness analysis indicating CST is a cheaper alternative to sites managers when approaching/recruiting sites</i> | Researchers 2, 4 and 5 | 31 <sup>st</sup> July (2020) |
| <i>3.2 CST-Investigators will explain the benefits of CST to possible CST-facilitators</i>                                                                                                            | Researchers 1 and 6    | 31 <sup>st</sup> July (2020) |

### **Costs (Direct and Indirect)**

#### *Essential*

| <b>Site: Rio de Janeiro / São José dos Campos Country: Brazil</b>                                                   |                                    |                              |
|---------------------------------------------------------------------------------------------------------------------|------------------------------------|------------------------------|
| <b>Action to be undertaken</b>                                                                                      | <b>Team member responsible for</b> | <b>Due by</b>                |
| <i>4.1 CST-Investigators will organize CST training on sites where CST sessions are going to be offered</i>         | Researchers 1 and 6                | 31 <sup>st</sup> July (2020) |
| <i>4.2 CST-facilitators should utilize the resources already available on site as material for the CST sessions</i> | Individual CST Facilitators        | 31 <sup>st</sup> July (2020) |

#### **Adaptability**

#### *Further consider*

| <b>Site: Rio de Janeiro / São José dos Campos Country: Brazil</b>                                            |                                    |                                |
|--------------------------------------------------------------------------------------------------------------|------------------------------------|--------------------------------|
| <b>Action to be undertaken</b>                                                                               | <b>Team member responsible for</b> | <b>Due by</b>                  |
| <i>5.1 Adapt CST material to illiterate people, people with disabilities and people with severe dementia</i> | All Researchers                    | 31 <sup>st</sup> August (2021) |

### **Network and Communications**

#### *Essential*

| <b>Site: Rio de Janeiro / São José dos Campos Country: Brazil</b>                                                                 |                                    |                              |
|-----------------------------------------------------------------------------------------------------------------------------------|------------------------------------|------------------------------|
| <b>Action to be undertaken</b>                                                                                                    | <b>Team member responsible for</b> | <b>Due by</b>                |
| <i>6.1 CST-Investigators will contact carer associations to facilitate advertising CST groups at national and regional levels</i> | Researchers 1 and 6                | 30 <sup>th</sup> June (2020) |

|                                                                                                                                          |                     |                                |
|------------------------------------------------------------------------------------------------------------------------------------------|---------------------|--------------------------------|
| <i>6.2 CST-Investigators will contact geriatrician associations to facilitate advertising CST groups at national and regional levels</i> | Researchers 5 and 9 | 30 <sup>th</sup> June (2020)   |
| <i>6.3 CST will be advertised through community centres, specialized polyclinics and via general practitioners</i>                       | Researchers 1 and 6 | 30 <sup>th</sup> June (2020)   |
| <i>6.4 A 'master trainer' course for CST facilitators will be developed to increase the pool of trainers in Brazil</i>                   | Researcher 10       | 30 <sup>th</sup> June (2020)   |
| <i>6.5 Offer regular supervision to newly trained CST facilitators</i>                                                                   | Researchers 1 and 3 | 31 <sup>st</sup> August (2021) |

### ***External policy and incentives***

#### ***Essential***

| <b>Site: Rio de Janeiro / São José dos Campos Country: Brazil</b>                                             |                                    |                                |
|---------------------------------------------------------------------------------------------------------------|------------------------------------|--------------------------------|
| <b>Action to be undertaken</b>                                                                                | <b>Team member responsible for</b> | <b>Due by</b>                  |
| <i>7.1 Contact with government stakeholders to discuss the possibility of implement CST at a policy level</i> | Researchers 2, 4 and 5             | 31 <sup>st</sup> August (2021) |

#### ***Further consider***

| <b>Site: Rio de Janeiro / São José dos Campos Country: Brazil</b>                                                                                                                                         |                                    |                                |
|-----------------------------------------------------------------------------------------------------------------------------------------------------------------------------------------------------------|------------------------------------|--------------------------------|
| <b>Action to be undertaken</b>                                                                                                                                                                            | <b>Team member responsible for</b> | <b>Due by</b>                  |
| <i>7.2 Contact with people responsible for decision making at a policy level in public and private domains to discuss the creation of private and public funding mechanisms for implementation of CST</i> | Researchers 4 and 5                | 31 <sup>st</sup> August (2021) |
| <i>7.3 Contact with prominent insurance companies to determine whether CST would be covered by insurers as part of a 'talking therapy'</i>                                                                | Researcher 4                       | 31 <sup>st</sup> August (2021) |

### ***Structural Characteristics***

#### ***Essential***

| <b>Site: Rio de Janeiro / São José dos Campos Country: Brazil</b> |
|-------------------------------------------------------------------|
|-------------------------------------------------------------------|

| <b>Action to be undertaken</b>                                                                                        | <b>Team member responsible for</b> | <b>Due by</b>                |
|-----------------------------------------------------------------------------------------------------------------------|------------------------------------|------------------------------|
| <i>8.1 Inform site management of protected time requirement for CST facilitators and ensure permission is granted</i> | Researchers 1 and 6                | 30 <sup>th</sup> June (2020) |
| <i>8.2. Inform site management that inclusion of CST into the weekly routine is a requirement</i>                     | Researchers 1 and 6                | 30 <sup>th</sup> June (2020) |
| <i>8.3 Offer CST training on different days/times</i>                                                                 | Researchers 1 and 6                | 30 <sup>th</sup> June (2020) |
| <i>8.4 CST-facilitators will plan the sessions according the staff holiday schedule</i>                               | Individual CST Facilitators        | 30 <sup>th</sup> June (2020) |
| <i>8.5 CST-facilitators will agree with carers which days and times are best for running CST groups</i>               | Individual CST Facilitators        | 30 <sup>th</sup> June (2020) |
| <i>8.6 Check that the site has an available space appropriate for running CST sessions</i>                            | Researchers 1 and 6                | 30 <sup>th</sup> June (2020) |
| <i>8.7 Offer information regarding CST to staff of the site where CST is being delivered</i>                          | Researchers 1 and 6                | 30 <sup>th</sup> June (2020) |

*Further consider*

| <b>Site: Rio de Janeiro / São José dos Campos Country: Brazil</b>                                                                                 |                                    |                              |
|---------------------------------------------------------------------------------------------------------------------------------------------------|------------------------------------|------------------------------|
| <b>Action to be undertaken</b>                                                                                                                    | <b>Team member responsible for</b> | <b>Due by</b>                |
| <i>8.8 CST facilitators should agree with carers how often their CST group should run (one or twice weekly)</i>                                   | Individual CST Facilitators        | 30 <sup>th</sup> June (2020) |
| <i>8.9 CST-Investigators should prefer sites that can be easily accessed by people with disabilities</i>                                          | Researchers 1 and 6                | 30 <sup>th</sup> June (2020) |
| <i>8.10 CST-Investigators should meet with teams in charge for screening for dementia in each site to identify potential underdiagnosed cases</i> | Researchers 1 and 6                | 30 <sup>th</sup> June (2020) |

### ***Individual Stage of Changes***

*Further consider*

| <b>Site: Rio de Janeiro / São José dos Campos Country: Brazil</b> |                                    |               |
|-------------------------------------------------------------------|------------------------------------|---------------|
| <b>Action to be undertaken</b>                                    | <b>Team member responsible for</b> | <b>Due by</b> |



|                                                                                                               |                     |                                      |
|---------------------------------------------------------------------------------------------------------------|---------------------|--------------------------------------|
| <i>9.1 Contact with government stakeholders to discuss the possibility of implement CST at a policy level</i> | Researchers 4 and 5 | 31 <sup>st</sup><br>August<br>(2021) |
|---------------------------------------------------------------------------------------------------------------|---------------------|--------------------------------------|

### **Action Plans for Individual Investigators**

#### ***Researcher 1***

| <b>CFIR Category</b>                            | <b>Action Point</b>                                                                                                    | <b>Due by</b> | <b>Completed on</b> |
|-------------------------------------------------|------------------------------------------------------------------------------------------------------------------------|---------------|---------------------|
| <b>ESSENTIAL</b>                                |                                                                                                                        |               |                     |
| Knowledge/<br>Beliefs about the<br>Intervention | Cultural adaptations of the Dementia Awareness Courses (DAC) with specific signposting for each site                   | 31.08.2019    | 20.08.2019          |
| Knowledge/<br>Beliefs about the<br>Intervention | Deliver the three hour DAC at regular intervals                                                                        | 30.06.2020    |                     |
| Relative<br>Advantage                           | CST-Investigators will explain the benefits of CST to possible CST-facilitators                                        | 31.07.2020    |                     |
| Costs                                           | CST-Investigators will organize CST training on sites where CST sessions are going to be offered                       | 31.07.2020    |                     |
| Network and<br>Communications                   | CST-Investigators will contact carer associations to facilitate advertising CST groups at national and regional levels | 30.06.2020    |                     |
| Network and<br>Communications                   | CST will be advertised through community centres, specialized polyclinics and via general practitioners                | 30.06.2020    |                     |
| Network and<br>Communications                   | Offer regular supervision to newly trained CST facilitators                                                            | 31.08.2021    |                     |



|                            |                                                                                                                                       |            |  |
|----------------------------|---------------------------------------------------------------------------------------------------------------------------------------|------------|--|
| Structural Characteristics | Inform site management of protected time requirement for CST facilitators and ensure permission is granted                            | 30.06.2020 |  |
| Structural Characteristics | Inform site management that inclusion of CST into the weekly routine is a requirement                                                 | 30.06.2020 |  |
| Structural Characteristics | Offer CST training on different days/times                                                                                            | 30.06.2020 |  |
| Structural Characteristics | Check that the site has an available space appropriate for running CST sessions                                                       | 30.06.2020 |  |
| Structural Characteristics | Offer information regarding CST to staff of the site where CST is being delivered                                                     | 30.06.2020 |  |
| <b>FURTHER CONSIDER</b>    |                                                                                                                                       |            |  |
| Adaptability               | Adapt CST material to illiterate people, people with disabilities and people with severe dementia                                     | 31.08.2021 |  |
| Structural Characteristics | CST-Investigators should prefer sites that can be easily accessed by people with disabilities                                         | 30.06.2020 |  |
| Structural Characteristics | CST-Investigators should meet with teams in charge for screening for dementia in each site to identify potential underdiagnosed cases | 30.06.2020 |  |

### *Researcher 2*

| <b>CFIR Category</b> | <b>Action Point</b>                                                                                      | <b>Due by</b> | <b>Completed on</b> |
|----------------------|----------------------------------------------------------------------------------------------------------|---------------|---------------------|
| <b>ESSENTIAL</b>     |                                                                                                          |               |                     |
| Travel               | CST-Investigators should approach leaders in community settings as possible sites offering CST           | 31.07.2020    |                     |
| Travel               | CST-Investigators should approach managers of hospital outpatient clinics as possible sites offering CST | 31.07.2020    |                     |

|                                |                                                                                                                                                                                            |            |  |
|--------------------------------|--------------------------------------------------------------------------------------------------------------------------------------------------------------------------------------------|------------|--|
| Relative Advantage             | CST-Investigators will explain the evidence-based benefits and the cost-effectiveness analysis indicating CST is a cheaper alternative to sites managers when approaching/recruiting sites | 31.07.2020 |  |
| External policy and incentives | Contact with government stakeholders to discuss the possibility of implement CST at a policy level                                                                                         | 31.08.2021 |  |
| <b>FURTHER CONSIDER</b>        |                                                                                                                                                                                            |            |  |
| Adaptability                   | Adapt CST material to illiterate people, people with disabilities and people with severe dementia                                                                                          | 31.08.2021 |  |

**Researcher 3**

| <b>CFIR Category</b>                         | <b>Action Point</b>                                                                               | <b>Due by</b> | <b>Completed on</b> |
|----------------------------------------------|---------------------------------------------------------------------------------------------------|---------------|---------------------|
| <b>ESSENTIAL</b>                             |                                                                                                   |               |                     |
| Knowledge/<br>Beliefs about the Intervention | Translation of the DAC material into Portuguese                                                   | 30.09.2019    | 27.09.2019          |
| Knowledge/<br>Beliefs about the Intervention | Invite and organise (room booking etc) DAC for family carers and possible CST-facilitators        | 30.06.2020    |                     |
| Network and Communications                   | Offer regular supervision to newly trained CST facilitators                                       | 31.08.2021    |                     |
| <b>FURTHER CONSIDER</b>                      |                                                                                                   |               |                     |
| Adaptability                                 | Adapt CST material to illiterate people, people with disabilities and people with severe dementia | 31.08.2021    |                     |

**Researcher 4**

| <b>CFIR Category</b> | <b>Action Point</b> | <b>Due by</b> | <b>Completed on</b> |
|----------------------|---------------------|---------------|---------------------|
|----------------------|---------------------|---------------|---------------------|

| <b>ESSENTIAL</b>               |                                                                                                                                                                                                |            |  |
|--------------------------------|------------------------------------------------------------------------------------------------------------------------------------------------------------------------------------------------|------------|--|
| Travel                         | CST-Investigators should approach leaders in community settings as possible sites offering CST                                                                                                 | 31.07.2020 |  |
| Travel                         | CST-Investigators should approach managers of hospital outpatient clinics as possible sites offering CST                                                                                       | 31.07.2020 |  |
| Relative Advantage             | CST-Investigators will explain the evidence-based benefits and the cost-effectiveness analysis indicating CST is a cheaper alternative to sites managers when approaching/recruiting sites     | 31.07.2020 |  |
| External policy and incentives | Contact with government stakeholders to discuss the possibility of implement CST at a policy level                                                                                             | 31.08.2021 |  |
| <b>FURTHER CONSIDER</b>        |                                                                                                                                                                                                |            |  |
| Adaptability                   | Adapt CST material to illiterate people, people with disabilities and people with severe dementia                                                                                              | 31.08.2021 |  |
| External policy and incentives | Contact with people responsible for decision making at a policy level in public and private domains to discuss the creation of private and public funding mechanisms for implementation of CST | 31.08.2021 |  |
| External policy and incentives | Contact with prominent insurance companies to determine whether CST would be covered by insurers as part of a ‘talking therapy’                                                                | 31.08.2021 |  |
| Individual Stage of Changes    | Contact with government stakeholders to discuss the possibility of implement CST at a policy level                                                                                             | 31.08.2021 |  |

**Researcher 5**

| <b>CFIR Category</b>           | <b>Action Point</b>                                                                                                                                                                            | <b>Due by</b> | <b>Completed on</b> |
|--------------------------------|------------------------------------------------------------------------------------------------------------------------------------------------------------------------------------------------|---------------|---------------------|
| <b>ESSENTIAL</b>               |                                                                                                                                                                                                |               |                     |
| Network and Communications     | CST-Investigators will contact geriatrician associations to facilitate advertising CST groups at national and regional levels                                                                  | 30.06.2020    |                     |
| Travel                         | CST-Investigators should approach leaders in community settings as possible sites offering CST                                                                                                 | 31.07.2020    |                     |
| Travel                         | CST-Investigators should approach managers of hospital outpatient clinics as possible sites offering CST                                                                                       | 31.07.2020    |                     |
| Relative Advantage             | CST-Investigators will explain the evidence-based benefits and the cost-effectiveness analysis indicating CST is a cheaper alternative to sites managers when approaching/recruiting sites     | 31.07.2020    |                     |
| External policy and incentives | Contact with government stakeholders to discuss the possibility of implement CST at a policy level                                                                                             | 31.08.2021    |                     |
| <b>FURTHER CONSIDER</b>        |                                                                                                                                                                                                |               |                     |
| Adaptability                   | Adapt CST material to illiterate people, people with disabilities and people with severe dementia                                                                                              | 31.08.2021    |                     |
| External policy and incentives | Contact with people responsible for decision making at a policy level in public and private domains to discuss the creation of private and public funding mechanisms for implementation of CST | 31.08.2021    |                     |
| Individual Stage of Changes    | Contact with government stakeholders to discuss the possibility of implement CST at a policy level                                                                                             | 31.08.2021    |                     |

**Researcher 6**

| <b>CFIR Category</b>                            | <b>Action Point</b>                                                                                                    | <b>Due by</b> | <b>Completed on</b> |
|-------------------------------------------------|------------------------------------------------------------------------------------------------------------------------|---------------|---------------------|
| <b>ESSENTIAL</b>                                |                                                                                                                        |               |                     |
| Knowledge/<br>Beliefs about the<br>Intervention | Deliver the three hour DAC at regular intervals                                                                        | 30.06.2020    |                     |
| Relative<br>Advantage                           | CST-Investigators will explain the benefits of CST to possible CST-facilitators                                        | 31.07.2020    |                     |
| Costs (Direct<br>and Indirect)                  | CST-Investigators will organize CST training on sites where CST sessions are going to be offered                       | 31.07.2020    |                     |
| Network and<br>Communications                   | CST-Investigators will contact carer associations to facilitate advertising CST groups at national and regional levels | 30.06.2020    |                     |
| Network and<br>Communications                   | CST will be advertised through community centres, specialized polyclinics and via general practitioners                | 30.06.2020    |                     |
| Structural<br>Characteristics                   | Inform site management of protected time requirement for CST facilitators and ensure permission is granted             | 30.06.2020    |                     |
| Structural<br>Characteristics                   | Inform site management that inclusion of CST into the weekly routine is a requirement                                  | 30.06.2020    |                     |
| Structural<br>Characteristics                   | Offer CST training on different days/times                                                                             | 30.06.2020    |                     |
| Structural<br>Characteristics                   | Check that the site has an available space appropriate for running CST sessions                                        | 30.06.2020    |                     |
| Structural<br>Characteristics                   | Offer information regarding CST to staff of the site where CST is being delivered                                      | 30.06.2020    |                     |
| <b>FURTHER CONSIDER</b>                         |                                                                                                                        |               |                     |

|                            |                                                                                                                                       |            |  |
|----------------------------|---------------------------------------------------------------------------------------------------------------------------------------|------------|--|
| Adaptability               | Adapt CST material to illiterate people, people with disabilities and people with severe dementia                                     | 31.08.2021 |  |
| Structural Characteristics | CST-Investigators should prefer sites that can be easily accessed by people with disabilities                                         | 30.06.2020 |  |
| Structural Characteristics | CST-Investigators should meet with teams in charge for screening for dementia in each site to identify potential underdiagnosed cases | 30.06.2020 |  |

**Researcher 7**

| <b>CFIR Category</b>                               | <b>Action Point</b>                                                                               | <b>Due by</b> | <b>Completed on</b> |
|----------------------------------------------------|---------------------------------------------------------------------------------------------------|---------------|---------------------|
| <b>ESSENTIAL</b>                                   |                                                                                                   |               |                     |
| Knowledge/<br>Beliefs about<br>the<br>Intervention | Invite and organise (room booking etc) DAC for family carers and possible CST-facilitators        | 30.06.2020    |                     |
| <b>FURTHER CONSIDER</b>                            |                                                                                                   |               |                     |
| Adaptability                                       | Adapt CST material to illiterate people, people with disabilities and people with severe dementia | 31.08.2021    |                     |

**Researcher 8**

| <b>CFIR Category</b>                               | <b>Action Point</b>                                                                                  | <b>Due by</b> | <b>Completed on</b> |
|----------------------------------------------------|------------------------------------------------------------------------------------------------------|---------------|---------------------|
| <b>ESSENTIAL</b>                                   |                                                                                                      |               |                     |
| Knowledge/<br>Beliefs about<br>the<br>Intervention | Cultural adaptations of the Dementia Awareness Courses (DAC) with specific signposting for each site | 31.08.2019    | 20.08.2019          |
| <b>FURTHER CONSIDER</b>                            |                                                                                                      |               |                     |

|              |                                                                                                   |            |  |
|--------------|---------------------------------------------------------------------------------------------------|------------|--|
| Adaptability | Adapt CST material to illiterate people, people with disabilities and people with severe dementia | 31.08.2021 |  |
|--------------|---------------------------------------------------------------------------------------------------|------------|--|

**Researcher 9**

| CFIR Category              | Action Point                                                                                                                  | Due by     | Completed on |
|----------------------------|-------------------------------------------------------------------------------------------------------------------------------|------------|--------------|
| <b>ESSENTIAL</b>           |                                                                                                                               |            |              |
| Network and Communications | CST-Investigators will contact geriatrician associations to facilitate advertising CST groups at national and regional levels | 30.06.2020 |              |

**Researcher 10**

| CFIR Category              | Action Point                                                                                                | Due by     | Completed on |
|----------------------------|-------------------------------------------------------------------------------------------------------------|------------|--------------|
| <b>ESSENTIAL</b>           |                                                                                                             |            |              |
| Network and Communications | A 'master trainer' course for CST facilitators will be developed to increase the pool of trainers in Brazil | 30.06.2020 |              |

**Researcher 11**

| CFIR Category                             | Action Point                                                                                                                                             | Due by     | Completed on |
|-------------------------------------------|----------------------------------------------------------------------------------------------------------------------------------------------------------|------------|--------------|
| <b>ESSENTIAL</b>                          |                                                                                                                                                          |            |              |
| Knowledge/ Beliefs about the Intervention | Develop a 3-hour dementia awareness course for family carers, with information on stigma, pharmacological and non-pharmacological interventions included | 31.05.2019 |              |

**Individual CST Facilitators**

| CFIR Category    | Action Point | Due by | Completed on |
|------------------|--------------|--------|--------------|
| <b>ESSENTIAL</b> |              |        |              |

|                             |                                                                                                          |            |  |
|-----------------------------|----------------------------------------------------------------------------------------------------------|------------|--|
| Costs (Direct and Indirect) | CST-facilitators should utilize the resources already available on site as material for the CST sessions | 31.07.2020 |  |
| Structural Characteristics  | CST-facilitators will plan the sessions according the staff holiday schedule                             | 30.06.2020 |  |
| Structural Characteristics  | CST-facilitators will agree with carers which days and times are best for running CST groups             | 30.06.2020 |  |
| <b>FURTHER CONSIDER</b>     |                                                                                                          |            |  |
| Structural Characteristics  | CST facilitators should agree with carers how often their CST group should run (one or twice weekly)     | 30.06.2020 |  |



## **Appendix 1: Barriers and Facilitators Local Checklist**

# **Local Checklist**

**Below are some commonly encountered problems when running CST groups. This checklist should be completed by a CST facilitator prior to running their first group.**

### → **Location of Group** (building and region)

\_\_\_\_\_

### → **Participants**

- ☐ Do all of your participants meet the ICD-10 criteria for dementia?

### → **Facilities**

- ☐ Will the session be held in a private place where participants will not be interrupted?
- ☐ Is the CST session in a neutral setting (e.g. it is not in a church)?
- ☐ Will there be access to drinking water?
- ☐ Is there a toilet nearby?
- ☐ Is there a table that can be used?
- ☐ Are there enough chairs?
- ☐ Are the chairs the right height?
- ☐ Is the place accessible for those with reduced mobility (e.g. wheelchair)?

### → **Travel and Timing**

- ☐ Can the building be reached by public transport?
- ☐ Is the building close enough to people's homes?
- ☐ Have you agreed which times and dates the CST sessions will be with carers?
- ☐ Have you checked if any holidays will interfere with the continuity of the sessions?

### → **Materials**

- ☐ Have you got all the materials you need (e.g. local foods for the food session)?
- ☐ Have you got all the electronic devices needed for the sessions? (e.g. notebook or cell phone with a playlist with the songs used in the session)?

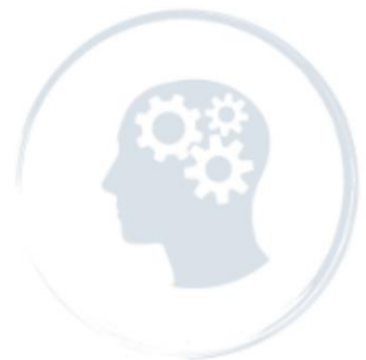

Supplement: Data_Sheet_1.PDF [file Data_Sheet_1.PDF]
